1 **Title:**

2 Sequential compression across latent space dimensions enhances gene expression  
3 signatures

4 **Authors:**

5 Gregory P. Way<sup>1,2</sup> (0000-0002-0503-9348), Michael Zietz<sup>2</sup> (0000-0003-0539-630X),  
6 Daniel S. Himmelstein<sup>2</sup> (0000-0002-3012-7446) and Casey S. Greene<sup>2\*</sup> (0000-0001-8713-  
7 9213)

8 **Affiliations:**

9 <sup>1</sup>Genomics and Computational Biology Graduate Group, Perelman School of Medicine,  
10 University of Pennsylvania, Philadelphia, PA 19104, USA.

11 <sup>2</sup>Department of Systems Pharmacology and Translational Therapeutics, University of  
12 Pennsylvania, Philadelphia, PA 19104, USA.

13 **Corresponding Author:**

14 Casey S. Greene  
15 10-131 SCTR 34<sup>th</sup> and Civic Center Blvd,  
16 Philadelphia, PA 19104  
17 Office: 215-573-2991  
18 Fax: 215-573-9135

19 **Keywords:**

20 Machine Learning, Dimensionality Reduction, Latent Space, Gene Expression,  
21 Autoencoders, Compression, Neural Network Interpretation

22

23 **Abstract:**

24 *Background*

25           Unsupervised machine learning algorithms applied to gene expression data extract  
26 latent, or hidden, signals representing technical and biological sources of variation. However,  
27 these algorithms require a user to select a biologically-appropriate latent dimensionality.

28 *Results*

29           We compressed gene expression data from three large transcriptomic datasets  
30 consisting of adult normal tissue, adult cancer tissue, and pediatric cancer tissue. Rather than  
31 selecting a single latent dimensionality, we sequentially compressed these data into many  
32 dimensions ranging from 2 to 200. We trained principal components analysis (PCA),  
33 independent components analysis (ICA), non-negative matrix factorization (NMF), denoising  
34 autoencoder (DAE), and variational autoencoder (VAE) models. We observed various tradeoffs  
35 for each model. For example, we observed high model stability between PCA, ICA, and NMF  
36 algorithms across latent dimensionalities. We identified more unique biological signatures in  
37 DAE and VAE model ensembles in intermediate latent dimensionalities. However, we captured  
38 the most pathway-associated features using all compressed features across algorithms,  
39 ensembles, and dimensions. We also used multiple latent dimensionalities to optimize gene  
40 expression signatures representing sample sex, neuroblastoma MYCN amplification, and  
41 various blood cell types, which generalized to external datasets. In supervised machine learning  
42 tasks, compressed features predicted cancer type and gene alteration status. In this setting, the  
43 best performing supervised models used features from different dimensionalities and

44 compression algorithms indicating that there was no single best dimensionality or compression  
45 algorithm.

## 46 *Conclusions*

47         Ensembles of features from different unsupervised algorithms discover biological  
48 signatures in large transcriptomic datasets. To enhance biological signature discovery, rather  
49 than compressing input data into a single pre-selected dimensionality, it is best to perform  
50 compression on input data over many latent dimensionalities.

51

## 52 **Introduction:**

53         Dimensionality reduction algorithms compress input data into feature representations  
54 that capture major sources of variation. Applied to gene expression data, compression  
55 algorithms identify latent biological and technical processes. These processes reveal important  
56 information about the samples and can help to generate hypotheses that are difficult or  
57 impossible to observe in the original genomic space. For example, applying PCA to a large  
58 cancer transcriptomic compendium determined the influence of copy number alterations in  
59 gene expression measurements [1]. Applying ICA to transcriptome data aggregated gene  
60 modules representing core pathways and hidden transcriptional programs [2,3]. Training NMF  
61 models using bulk gene expression data estimated cell type proportion [4,5]. DAEs have  
62 revealed latent signals characterizing oxygen exposure and transcription factor targets [6,7],  
63 and VAEs have identified biologically relevant latent features discriminating cancer subtypes  
64 and drug response [8,9]. Nevertheless, a major challenge to all compression applications is the

65 fundamental requirement that a researcher must determine the number of latent dimensions  
66 ( $k$ ) to compress the input data into.

67         Instead, it is possible that different biological signatures are best captured at different  
68 latent space dimensionalities. To test this, we train and evaluate various compression models  
69 across a wide range of latent space dimensionalities, from  $k = 2$  to  $k = 200$ . We train PCA, ICA,  
70 NMF, DAE, and VAE models using RNAseq gene expression data from three different datasets:  
71 The Cancer Genome Atlas (TCGA) PanCanAtlas [10], the Genome Tissue Expression Consortium  
72 Project (GTEx) [11], and the Therapeutically Applicable Research To Generate Effective  
73 Treatments (TARGET) Project [12]. We demonstrate various model tradeoffs in reconstruction  
74 cost, stability, and gene set coverage in training and testing sets across algorithms and latent  
75 dimensionalities. We observe that several distinct gene expression signatures are optimized in  
76 various models spanning low, intermediate, and high latent dimensionalities. We determine  
77 that compressing gene expression data using various latent dimensionalities and algorithms  
78 enhances biological signature discovery. We name this sequential compression approach  
79 “BioBombe” after the large mechanical device developed by Alan Turing and other cryptologists  
80 in World War II to decode encrypted messages sent by Enigma machines. BioBombe  
81 sequentially compresses gene expression input data with increasing latent dimensions to  
82 decipher and enhance biological signatures embedded within compressed gene expression  
83 features.

84

85 **Results:**

86 *BioBombe implementation*

87 We compressed RNAseq data from TCGA, GTEx, and TARGET using PCA, ICA, NMF, DAE,  
 88 and VAE across 28 different latent dimensions ( $k$ ) ranging from  $k = 2$  to  $k = 200$ . We split each  
 89 dataset into 90% training and 10% test sets balanced by cancer type or tissue type and trained  
 90 models using only the training data. We used real and permuted data and initialized each  
 91 model five times per latent dimension resulting in a total of 4,200 different compression  
 92 models (**Additional File 1: Figure S1**). We evaluated hyperparameters for DAE and VAE models  
 93 across dimensions and trained models using optimized parameter settings (**Additional File 2;**  
 94 **Additional File 1: Figure S2**). See **Fig. 1** for an outline of our approach. We provide full  
 95 BioBombe analysis results for all compression models across datasets for both real [13–15] and  
 96 permuted data [16–18] in both training and test sets as publicly available resources.  
 97

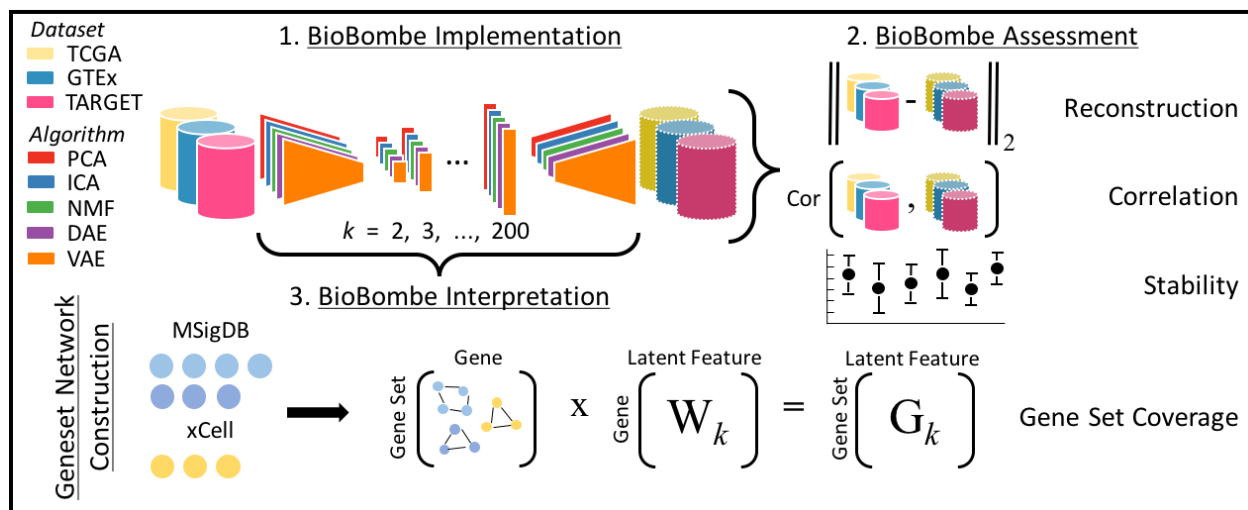

98  
 99 **Figure 1: Overview of the BioBombe approach.** We implemented BioBombe on three datasets  
 100 using five different algorithms. We sequentially compressed input data into various latent  
 101 dimensionalities. We calculated various metrics that describe different benefits and trade-offs of  
 102 the algorithms. Lastly, we implemented a network projection approach to interpret the  
 103 compressed latent features. We used MSigDB collections and xCell gene sets to interpret  
 104 compressed features.

105

106 *Assessing compression algorithm reconstruction*

107           Reconstruction cost, a measurement of the difference between the input and output  
108 matrices, is often used to describe the ability of compression models to capture fundamental  
109 processes in latent space features that recapitulate the original input data. We tracked the  
110 reconstruction cost for the training and testing data partitions for all datasets, algorithms,  
111 latent dimensions, and random initializations. As expected, we observed lower reconstruction  
112 costs in models trained with real data and with higher latent dimensions (**Additional File 1:**  
113 **Figure S3**). Because PCA and ICA are rotations of one another, we used the identical scores as a  
114 positive control. All compression algorithms had similar reconstruction costs, with the highest  
115 variability at low latent dimensions (**Additional File 1: Figure S3**).

116

117 *Evaluating model stability and similarity within and across latent dimensions*

118           We applied singular vector canonical correlation analysis (SVCCA) to algorithm weight  
119 matrices to assess model stability within algorithm initializations, and to determine model  
120 similarity between algorithms [19]. Briefly, SVCCA calculates similarity between two  
121 compression algorithm weight matrices by learning appropriate linear transformations and  
122 iteratively matching the highest correlating features. Training with TCGA data, we observed  
123 highly stable models within algorithms and within all latent dimensionalities for PCA, ICA, NMF  
124 (along the matrix diagonal in **Fig 2a**). VAE models were also largely stable, with some decay in  
125 higher latent dimensions. However, DAE models were unstable, particularly at low latent  
126 dimensions (**Fig 2a**). We also compared similarity across algorithms. Because PCA and ICA are  
127 rotations of one another, we used the high stability as a positive control for SVCCA estimates.

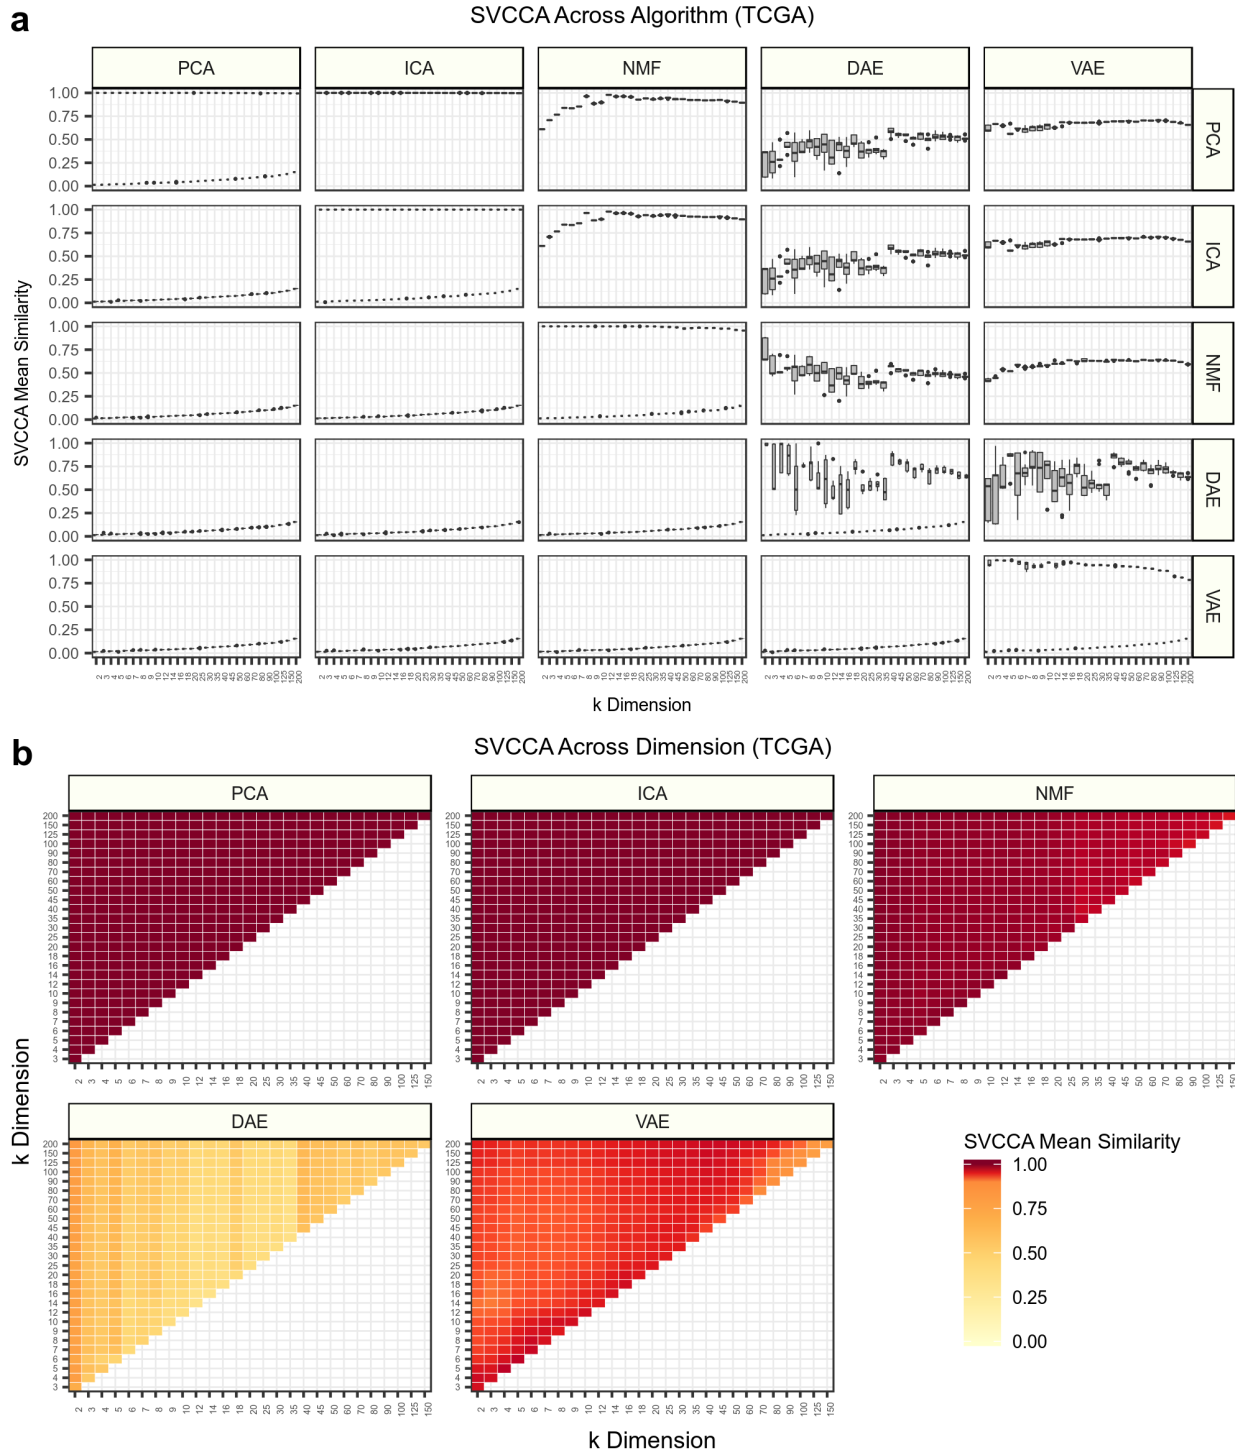

128

129 **Figure 2: Assessing algorithm and dimension stability with singular vector canonical correlation**  
 130 **analysis (SVCCA).** (a) SVCCA applied to the weight matrices learned by each compression  
 131 algorithm in gene expression data from The Cancer Genome Atlas (TCGA). The mean of all  
 132 canonical correlations comparing independent iterations is shown. The distribution of mean  
 133 similarity represents a comparison of all pairwise iterations within and across algorithms. The

134 upper triangle represents SVCCA applied to real gene expression data, while the lower triangle  
135 represents permuted expression data. Both real and permuted data are plotted along the  
136 diagonal. **(b)** Mean correlations of all iterations within algorithms but across  $k$  dimensions. SVCCA  
137 will identify  $\min(i, j)$  canonical vectors for latent dimensions  $k_i$  and  $k_j$ . The mean of all pairwise  
138 correlations is shown for all combinations of  $k$  dimensions.

139

140 NMF was also highly similar to PCA and ICA, particularly at low latent dimensions (**Fig. 2a**). VAE  
141 models were more similar to PCA, ICA, and NMF than DAE models, particularly at low latent  
142 dimensions, and the instability patterns within DAE models also lead to large differences across  
143 algorithms (**Fig. 2a**). We observed similar patterns in GTEx and TARGET data, despite TARGET  
144 containing only about 700 samples (**Additional File 1: Figure S4**).

145 We also used SVCCA to compare the similarity of weight matrices across latent  
146 dimensions. Both PCA and ICA found highly similar solutions across all dimensions (**Fig. 2b**). This  
147 is expected since the solutions are deterministic and are arranged with decreasing amounts of  
148 variance. NMF also identified highly similar solutions in low dimensions, but solutions were less  
149 similar in higher dimensions. DAE solutions were the least similar, with intermediate  
150 dimensions showing the lowest mean similarity. VAE models displayed relatively high model  
151 similarity, but there were regions of modest model stability in intermediate and high  
152 dimensions (**Fig. 2b**). We observed similar patterns in GTEx and TARGET data (**Additional File 1:**  
153 **Figure S5**).

154

155 *Sequential compression can enhance gene expression signature discovery*

156 We tested the ability of BioBombe sequentially compressed features to isolate various  
157 biological signatures. First, we tested the ability to differentiate sample sex; which has been  
158 previously observed to be captured in latent space features [8,20,21]. We performed a two-



159 tailed t-test comparing male and female samples in GTEx across all initializations, algorithms,  
160 and latent dimensions. We optimally identified this phenotype in higher latent dimensions,  
161 particularly in VAE and NMF models (**Fig. 3a**). The top feature separating GTEx males and  
162 females was VAE feature 108 in  $k = 200$  ( $t = 49.0$ ,  $p = 2.7 \times 10^{-285}$ ) (**Fig 3b**). We performed the  
163 same approach using BioBombe features in TCGA data. Whereas the largest models appeared  
164 to capture sex optimally in GTEx data, intermediate latent dimensions best captured sex in  
165 TCGA data (**Fig. 3c**). The top latent dimension identified was not consistent across algorithms.  
166 The top feature distinguishing TCGA males and females was VAE feature 16 in the  $k = 20$  model  
167 ( $t = -13.9$ ,  $p = 1.8 \times 10^{-40}$ ) (**Fig. 3d**).

168 We also tested the ability of BioBombe to distinguish MYCN amplification in  
169 neuroblastoma (NBL) tumors. MYCN amplification is a biomarker associated with poor  
170 prognosis in NBL patients [22]. Using latent features derived from the full TARGET data, we  
171 performed a two-tailed t-test comparing MYCN amplified vs. MYCN not amplified NBL tumors.  
172 Each algorithm discovered optimal signal at various latent dimensions, but the best feature was  
173 identified in VAE models at  $k = 200$  (**Fig. 3e**). Although there were some potentially  
174 mischaracterized samples, feature 111 in VAE  $k = 200$  robustly separated MYCN amplification  
175 status in NBL tumors ( $t = 17.5$ ,  $p = 3.0 \times 10^{-37}$ ) (**Fig. 3f**). This feature also distinguished MYCN  
176 amplification status in NBL cell lines [23] that were previously not used for training by the  
177 compression model or for feature selection ( $t = 2.9$ ,  $p = 7.1 \times 10^{-3}$ ) (**Fig. 3g**).

178

179

180

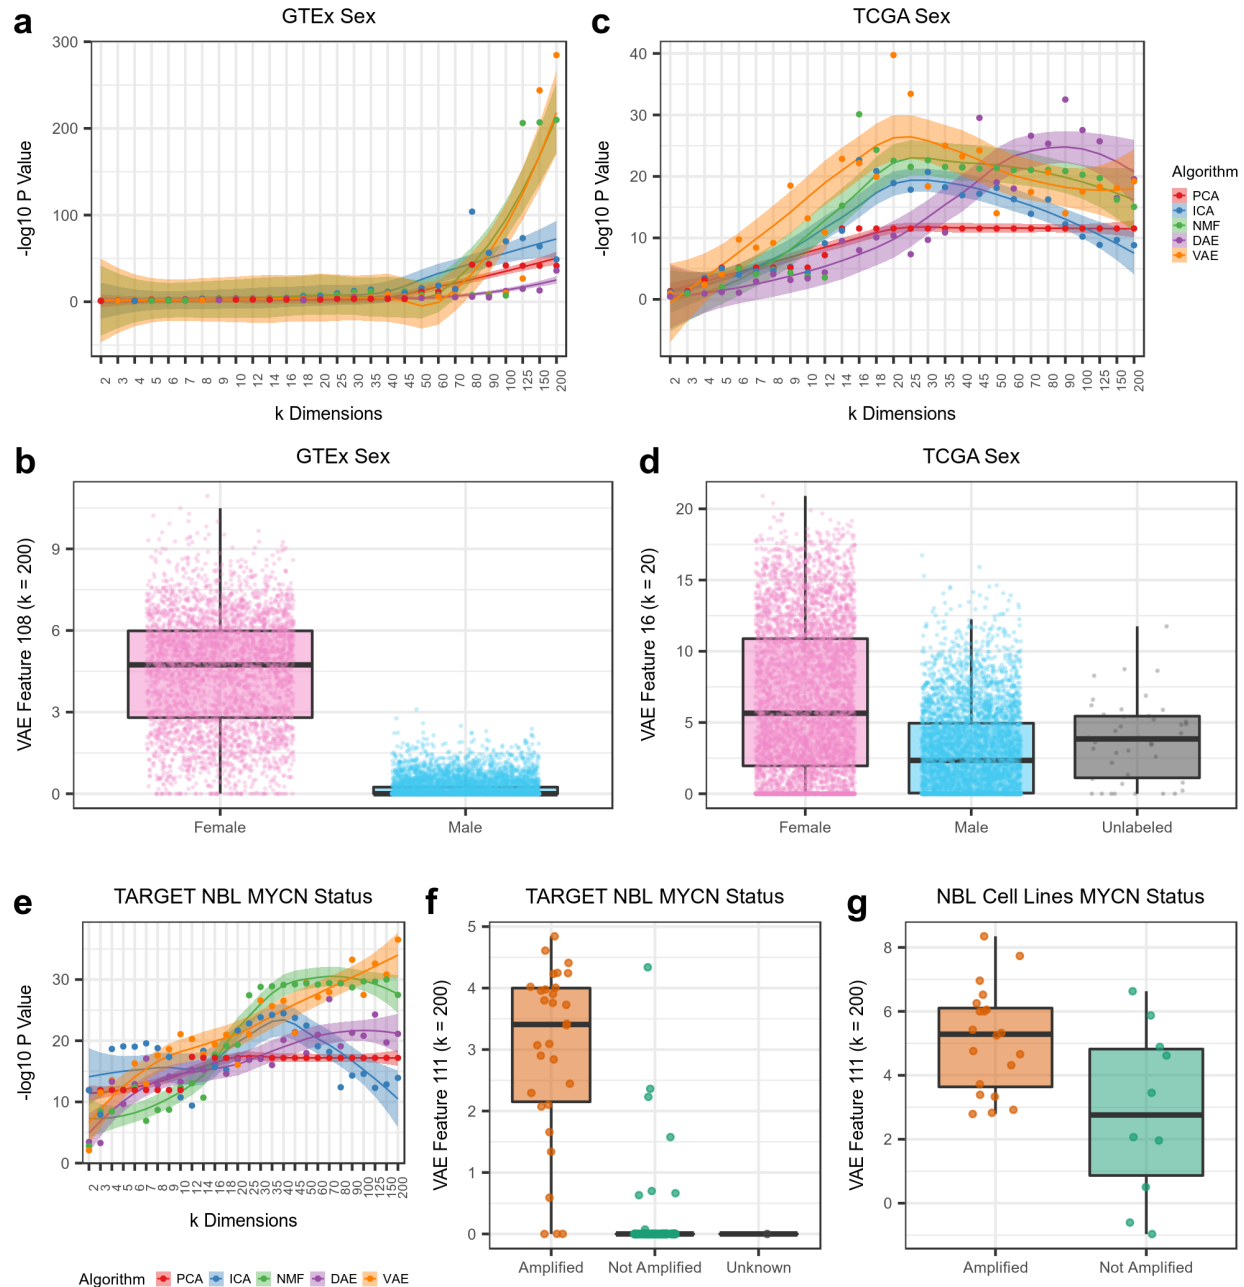

181

182 **Figure 3: Using BioBombe as a signature discovery tool.** Detecting GTEx sample sex across (a)  
 183 various latent dimensions and algorithms, and (b) the latent feature with the highest enrichment.  
 184 Detecting TCGA patient sex across (c) various latent dimensionalities, and (d) the latent feature  
 185 with the highest enrichment. Detecting TARGET MYCN amplification in neuroblastoma (NBL)  
 186 tumors (e) across various latent dimensions, and (f) the latent feature with the highest  
 187 enrichment. (g) Applying the MYCN signature to an external dataset of NBL cell lines implicates  
 188 MYCN amplified cell lines.

189

## 190 *Assessing gene set coverage of compression models*

191 We used gene sets from Molecular Signatures Database (MSigDB) and xCell [24–26] to  
192 interpret biological signals activated in compressed features across all latent dimensionalities,  
193 algorithms, and initializations. We applied a network projection approach to model weight  
194 matrices to determine gene set coverage (see methods for more details). Specifically, we  
195 tracked coverage of three MSigDB gene set collections representing transcription factor (TF)  
196 targets, cancer modules, and Reactome pathways across latent dimensions in TCGA data (**Fig.**  
197 **4**). In all cases, we observed higher gene set coverage in models with larger latent  
198 dimensionalities. Considering individual models, we observed high coverage in PCA, ICA, and  
199 NMF. In particular, ICA outperformed all other algorithms (**Fig. 4a**). However, while these  
200 methods showed the highest coverage, the features identified had relatively low enrichment  
201 scores compared to AE models (**Additional File 1: Figure S6**).

202 Aggregating all five random initializations into ensemble models, we observed  
203 substantial coverage increases, especially for AEs (**Fig. 4b**). VAE models had high coverage for all  
204 gene sets in intermediate dimensions, while DAE improved in higher dimensions. However, at  
205 the highest dimensions, ICA demonstrated the highest coverage. NMF consistently had the  
206 highest enrichment scores, but the lowest coverage (**Fig. 4b**). When considering all models  
207 combined (forming an ensemble of algorithm ensembles) within latent dimensionalities, we  
208 observed substantially increased coverage of all gene sets. However, most of the unique gene  
209 sets were contributed by the AE models (**Fig. 4c**). Lastly, when we aggregated all BioBombe  
210 features across all algorithms and all latent dimensions together into a single model, we  
211 observed the highest gene set coverage (**Fig. 4c**). These patterns were consistent across other

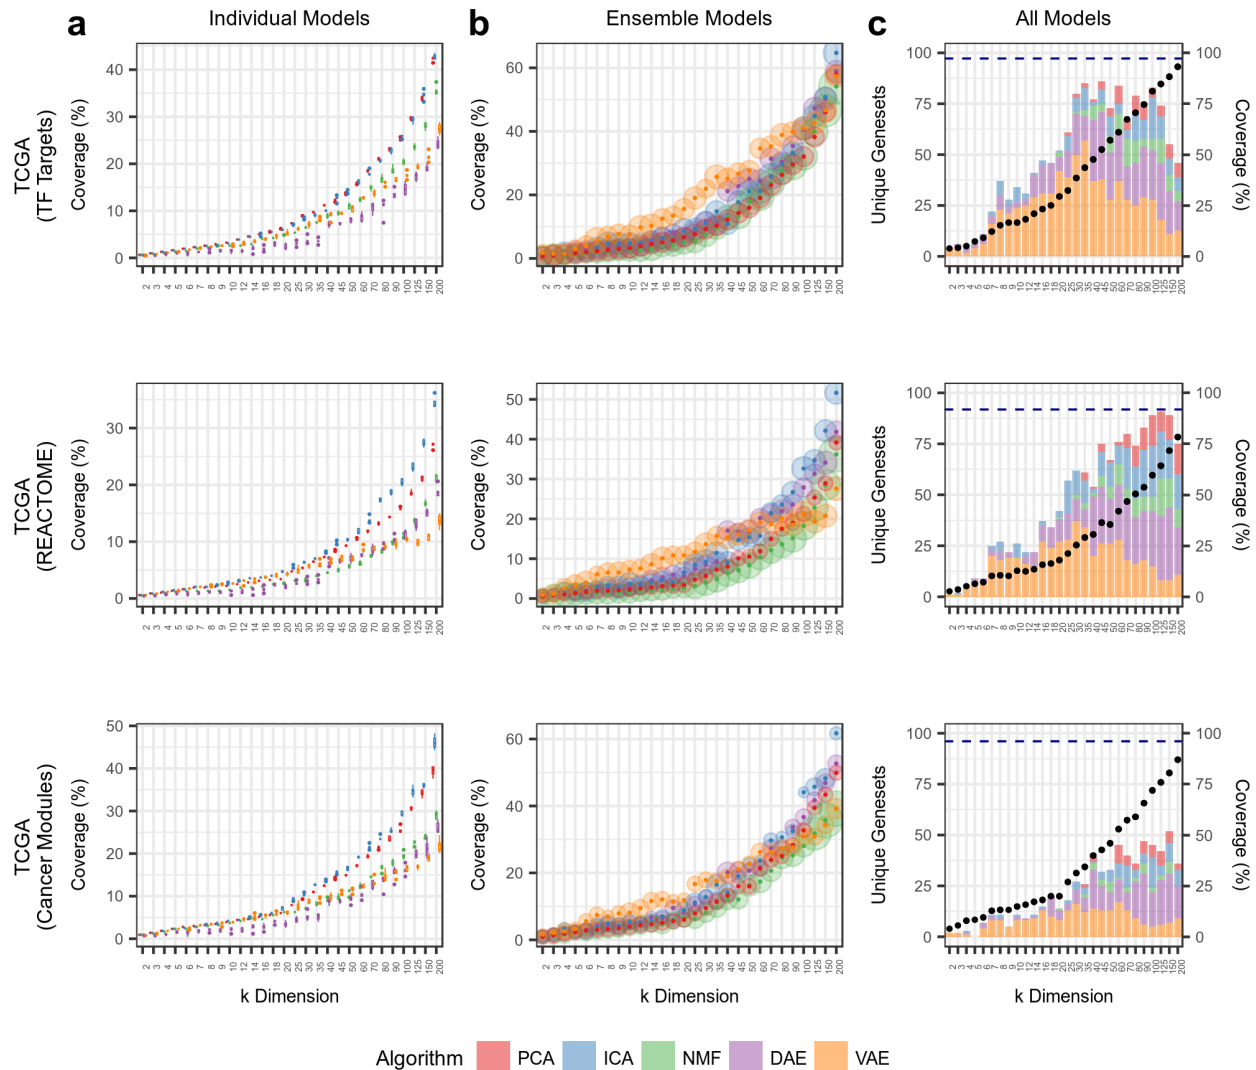

212

213 **Figure 4:** Assessing gene set coverage of specific gene set collections. Tracking results in TCGA  
 214 data for three gene set collections representing transcription factor (TF) targets (C3TFT),  
 215 Reactome pathways (C2CPREACTOME), and cancer modules (C4CM). **(a)** Tracking coverage in  
 216 individual models, which represents the distribution of scores across five algorithm iterations. **(b)**  
 217 Tracking coverage in ensemble models, which represents coverage after combining all five  
 218 iterations into a single model. The size of the point represents relative enrichment strength. **(c)**  
 219 Tracking coverage in all models combined within  $k$  dimensions. The number of algorithm-specific  
 220 unique gene sets identified is shown as bar charts. Coverage for all models combined across all  $k$   
 221 dimensions is shown as a dotted navy blue line.  
 222

223 gene set collections and datasets (**Additional File 1: Figure S7**). In general, while models

224 compressed with larger latent space dimensions had higher gene set coverage, many individual

225 gene sets were captured with the highest enrichment in models with low and intermediate  
226 dimensions (**Additional File 1: Figure S8**). These results indicated that biological signature  
227 discovery is enhanced when using various compression algorithms with various latent space  
228 dimensionalities.

229

### 230 *Observing the latent dimensionality of specific tissue and cell type signatures*

231 We measured the Pearson correlation between all samples' gene expression input and  
232 reconstructed output. As expected, we observed increased mean correlation and decreased  
233 variance as the latent dimensions increased in TCGA data (**Fig. 5a**). We also observed similar  
234 patterns in GTEx and TARGET data (**Additional File 1: Figure S9**). Across all datasets, in  
235 randomly permuted data, we observed correlations near zero (**Additional File 1: Figure S9**). The  
236 correlation with real data was not consistent across all algorithms as PCA, ICA, and NMF  
237 generally outperformed the AE models.

238 We tracked correlation differences across latent dimensionalities to determine the  
239 dimension at which specific sample types are initially detected. Most cancer types, including  
240 breast invasive carcinoma (BRCA) and colon adenocarcinoma (COAD), displayed relatively  
241 gradual increases in sample correlation as the latent dimensionality increased (**Fig. 5b**).  
242 However, in other cancer types, such as low grade glioma (LGG), pheochromocytoma and  
243 paraganglioma (PCPG), and acute myeloid leukemia (LAML), we observed large correlation  
244 gains with a single increase in latent dimension (**Fig. 5c**). We also observed similar performance  
245 spikes in GTEx data for several tissues including liver, pancreas, and blood (**Fig. 5d**). This sudden

246 and rapid increase in correlation in specific tissues occurred at different latent dimensions for  
 247 different algorithms, but was consistent across algorithm initializations.

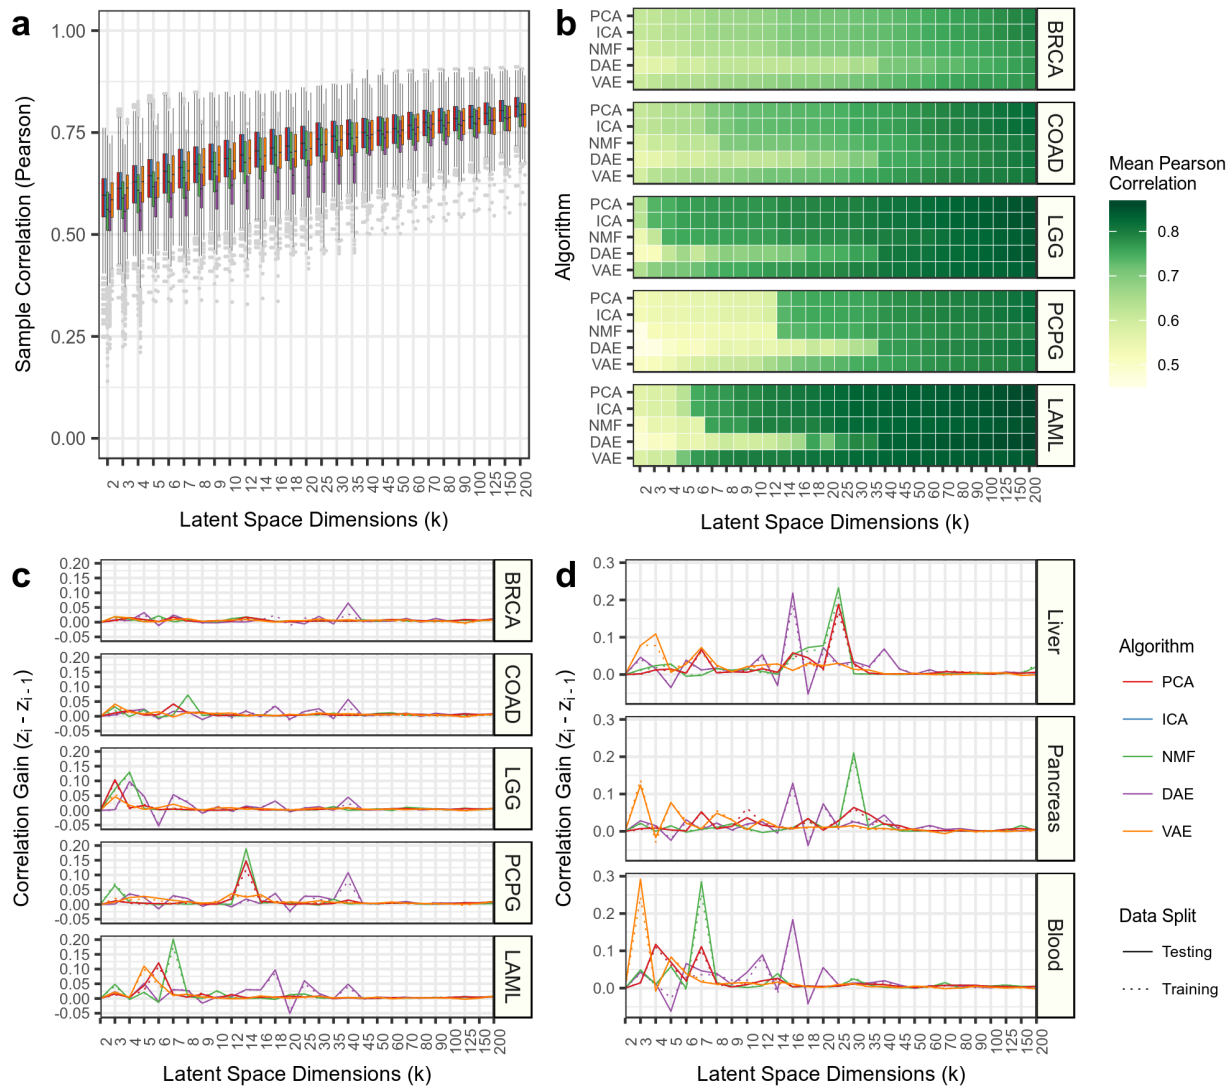

248  
 249 **Figure 5: Different latent dimensionalities implicate different tissue types.** (a) Sample Pearson  
 250 correlation for all data in the testing data partition for The Cancer Genome Atlas (TCGA). The  
 251 different algorithms follow the legend provided in panel d. (b) Mean Pearson correlation for  
 252 select cancer types in the testing data partition. Pearson correlation gain between sequential  
 253 latent dimensions for (c) select cancer types in TCGA and (d) select tissue-types in GTEx.  
 254

255 We more closely examined the sharp increase in GTEx blood tissue correlation between  
 256 latent space dimensions 2 and 3 in VAE models (See Fig. 5d). We hypothesized that a difference

257 in reconstruction for a specific tissue at such a low dimensionality could be driven by a change  
258 in the cell types captured by the model. We applied network projection of xCell gene sets to all  
259 compressed features in both VAE models. xCell gene sets represent computationally derived  
260 cell type signatures [25]. The top features identified for the VAE  $k = 2$  model included skeletal  
261 muscle, keratinocyte, and neuronal gene sets (**Fig. 6a**). Skeletal muscle was the most significant  
262 gene set identified likely because it the tissue with the most samples in GTEx. Similar gene sets  
263 were enriched in the  $k = 3$  model, but we also observed enrichment for a specific neutrophil  
264 gene set (“Neutrophils\_HPCA\_2”) (**Fig. 6a**). Neutrophils represent 50% of all blood cell types,  
265 which may explain the increased correlation in blood tissue observed in VAE  $k = 3$  models. The  
266 features implicated using the network projection approach were similar to an  
267 overrepresentation analysis using high weight genes in both tails of the VAE  $k = 3$  feature  
268 (**Additional File 1: Figure S10**).

269 We also calculated the mean absolute value z scores for xCell gene sets in all  
270 compression features for both VAE models with  $k = 2$  and  $k = 3$  dimensions (**Fig. 6b**). Again, we  
271 observed skeletal muscle, keratinocytes, and neuronal gene sets to be enriched in both models.  
272 However, we also observed a cluster of monocyte gene sets (including  
273 “Monocytes\_FANTOM\_2”) with enrichment in  $k = 3$ , but low enrichment in  $k = 2$  (**Fig. 6b**).  
274 Monocytes are also important cell types found in blood, and it is probable these signatures also  
275 contributed to the increased correlation for the reconstructed blood samples in VAE  $k = 3$   
276 models. We provide the full list of xCell gene set genes for the neutrophil and monocyte gene  
277 sets that intersected with the GTEx data in **Additional File 3**.

278



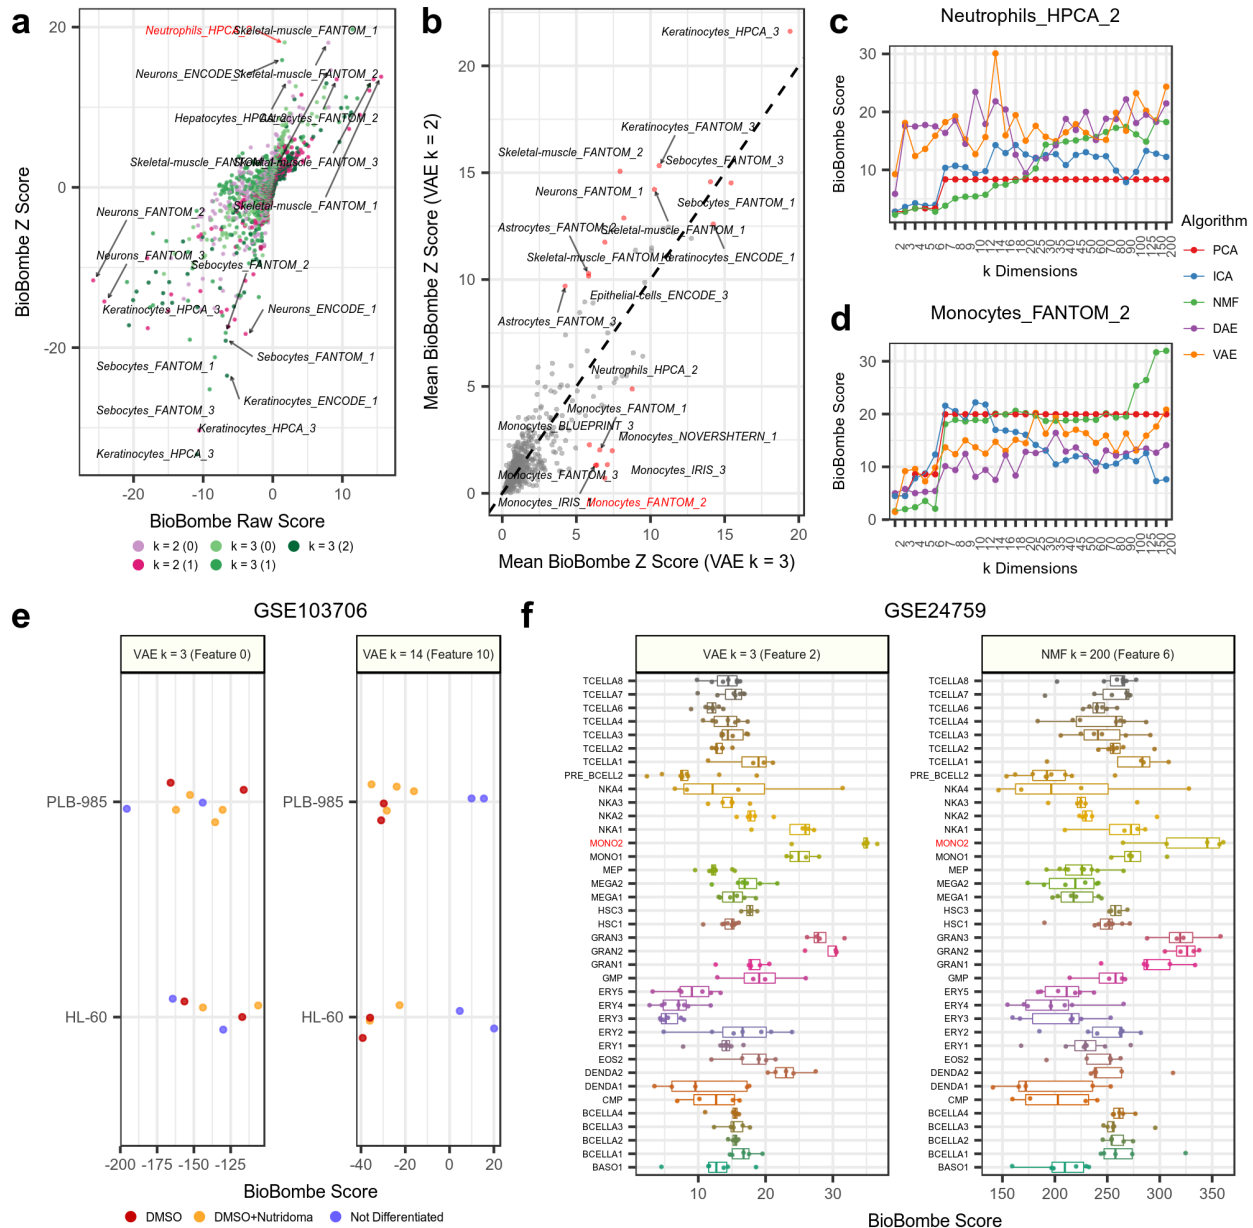

279

280 **Figure 6: Interpreting blood cell types in GTEx using xCell gene sets. (a)** Comparing BioBombe  
 281 scores of all compressed latent features for variational autoencoder (VAE) models when  
 282 bottleneck dimensions are set to  $k = 2$  and  $k = 3$ . **(b)** Comparing mean BioBombe Z scores of  
 283 aggregated latent features across two VAE models with  $k$  dimensions 2 and 3. Tracking the  
 284 BioBombe Z scores of **(c)** “Neutrophils\_HPCA\_2” and **(d)** “Monocytes\_FANTOM\_2” gene sets  
 285 across dimensions and algorithms. Only the top scoring feature per algorithm and dimension is  
 286 shown. **(e)** Projecting the VAE feature  $k = 3$  feature 2 and the highest scoring feature (VAE  $k = 14$ )  
 287 that best captures a neutrophil signature to an external dataset measuring neutrophil  
 288 differentiation treatments (GSE103706). **(f)** Projecting the VAE  $k = 3$  feature that best captures  
 289 monocytes and the feature of the top scoring model (NMF  $k = 200$ ) to an external dataset of  
 290 isolated hematopoietic cell types (GSE24759).



291 We scanned all other algorithms and latent dimensions to identify other compression  
292 features with high enrichment scores in the “Neutrophils\_HPCA\_2” (**Fig. 6c**) and  
293 “Monocytes\_FANTOM\_2” gene sets (**Fig. 6d**). We observed stronger enrichment of the  
294 “Neutrophil\_HPCA\_2” gene set in AE models compared to PCA, ICA, and NMF, especially at  
295 lower latent dimensions. We observed the highest score for the “Neutrophil\_HPCA\_2” gene set  
296 at  $k = 14$  in VAE models (**Fig. 6c**). The top VAE feature at  $k = 14$  correlated strongly with the VAE  
297 feature learned at  $k = 3$  (**Additional File 1: Figure S10**). Conversely, PCA, ICA, and NMF  
298 identified the “Monocytes\_FANTOM\_2” signature with higher enrichment than the AE models  
299 (**Fig. 6d**). We observed a performance spike at  $k = 7$  for both PCA and NMF models, but the  
300 highest enrichment for “Monocytes\_FANTOM\_2” occurred at  $k = 200$  in NMF models.

301

### 302 *Validating GTEX neutrophil and monocyte signatures in external datasets*

303 We downloaded a processed gene expression dataset (GSE103706) that applied two  
304 treatments to induce neutrophil differentiation in two leukemia cell lines [27]. We hypothesized  
305 that projecting the dataset on the “Neutrophil\_HPCA\_2” signature would reveal differential  
306 scores in the treated cell lines. We observed large differences in sample activations of treated  
307 vs untreated cell lines in the top Neutrophil signature (VAE  $k = 14$ ) (**Fig. 6e**). We also tested the  
308 “Monocytes\_FANTOM\_2” signature on a different publicly available dataset (GSE24759)  
309 measuring gene expression of isolated cell types undergoing hematopoiesis [28]. We observed  
310 increased scores for isolated monocyte cell population (MONO2) and relatively low scores for  
311 several other cell types for top VAE features (**Fig. 6f**).

312 We applied the top signatures for the neutrophil and monocyte gene sets to each  
313 external dataset (see **Fig. 6c, d**). We observed variable enrichment patterns across different  
314 algorithms and latent dimensionalities (**Additional File 1: Figure S11a**). These separation  
315 patterns were associated with network projection scores in NMF models, but were not  
316 consistent with other algorithms (**Additional File 1: Figure S11b**). Taken together, in this  
317 analysis we determined that 1) adding a single latent dimension that captured Neutrophil and  
318 Monocyte signatures improved signal detection in GTEx blood, 2) these gene expression  
319 signatures are enhanced at different latent dimensionalities and by different algorithms, and 3)  
320 these signatures generalized to external datasets that were not encountered during model  
321 training.

322

### 323 *Using BioBombe features in supervised learning applications*

324 We used BioBombe compressed features in two supervised machine learning tasks.  
325 First, we trained logistic regression models using compressed BioBombe features from  
326 individual model iterations as input to predict each of the 33 different TCGA cancer types.  
327 Nearly all cancer types could be predicted with high precision and recall (**Additional File 1:**  
328 **Figure S12**). We observed multiple performance spikes at varying latent dimensionalities for  
329 different cancer types and algorithms, which typically occurred in small latent dimensions (**Fig.**  
330 **7a**). Next, we input BioBombe features into the supervised classifier to predict samples with  
331 alterations in the top 50 most mutated genes in TCGA (**Additional File 1: Figure S13**). We  
332 focused on predicting four cancer genes and one negative control; *TP53*, *PTEN*, *PIK3CA*, *KRAS*,  
333 and *TTN* (**Fig. 7b**). *TTN* is a particularly large gene and is associated with a high passenger

334 mutation burden and should provide no predictive signal [29]. As expected, we did not observe  
335 any signal in predicting *TTN* (**Fig. 7b**). Again, we observed performance increases at varying  
336 latent dimensionalities across algorithms. However, predictive signal for mutations occurred at  
337 higher latent dimensions compared to cancer types (**Fig. 7c**). Compared to features trained  
338 within algorithm and within iteration, an ensemble of five VAE models and an ensemble of five  
339 models representing one iteration of each algorithm (PCA, ICA, NMF, DAE, and VAE), identified  
340 cancer type and mutation status in earlier dimensions compared to single model iterations (**Fig**  
341 **7c**). We also tracked the logistic regression coefficients assigned to each compression feature.  
342 DAE models consistently displayed sparse models, and the VAE ensemble and model ensemble  
343 also induced high sparsity (**Fig. 7d**).

344       Lastly, we trained logistic regression classifiers using all 30,850 BioBombe features  
345 generated across iterations, algorithms, and latent dimensions. These models were sparse and  
346 high performing; comparable to logistic regression models trained using raw features (**Fig. 7e**).  
347 Of all 30,850 compressed features in this model, only 317 were assigned non-zero weights  
348 (1.03%). We applied the network projection approach using Hallmark gene sets to interpret the  
349 biological signatures of the top supervised model coefficients. The top positive feature was  
350 derived from a VAE trained with  $k = 200$ . The top hallmarks of this feature included  
351 “ESTROGEN\_RESPONSE\_EARLY”, “ESTROGEN\_RESPONSE\_LATE”, and “P53\_PATHWAY”. The top  
352 negative feature was derived from a VAE trained with  $k = 150$  and was associated with hallmark  
353 genesets including “BILE\_ACID\_METABOLISM”, “EPITHELIAL\_MESENCHYMAL\_TRANSITION”,  
354 and “FATTY\_ACID\_METABOLISM”. **Additional File 4** includes a full list of logistic regression  
355 coefficients and hallmark network projection scores. Overall, the features selected by the

356 supervised classifier were distributed across algorithms and latent dimensions suggesting that  
357 combining signatures across dimensionalities and algorithms provided the best representation  
358 of the signal (**Fig. 7f**).

359 **Discussion:**

360 Our primary observation is that compressing complex gene expression data using  
361 multiple latent dimensionalities and algorithms enhances biological signature discovery. Across  
362 multiple latent dimensionalities, we identified optimal features to stratify sample sex, MYCN  
363 amplification, blood cell types, cancer types, and mutation status. Furthermore, the complexity  
364 of biological features was associated with the number of latent dimensions used. We predicted  
365 gene mutation using models with high dimensionality, but we detected cancer type with high  
366 accuracy using models with low dimensionality. In general, unsupervised learning algorithms  
367 applied to gene expression data extract biological and technical signals present in input  
368 samples. When applying these algorithms, researchers must determine how many latent  
369 dimensions to compress their input data into and different studies can have a variety of goals.  
370 For example, compression algorithms used for visualization can stratify sample groups based on  
371 the largest sources of variation [30–35]. In visualization settings, selecting a small number of  
372 latent dimensions is often best, and there is no need for sequential compression. However, if  
373 the analysis goal includes learning biological signatures to identify more subtle patterns in input  
374 samples, then there is not a single optimal latent dimensionality nor optimal algorithm. While  
375 compressing data into a single latent dimension will capture many biological signals, the  
376 “correct” dimension is not always clear, and several biological signatures may be better  
377 revealed in alternative latent dimensions.

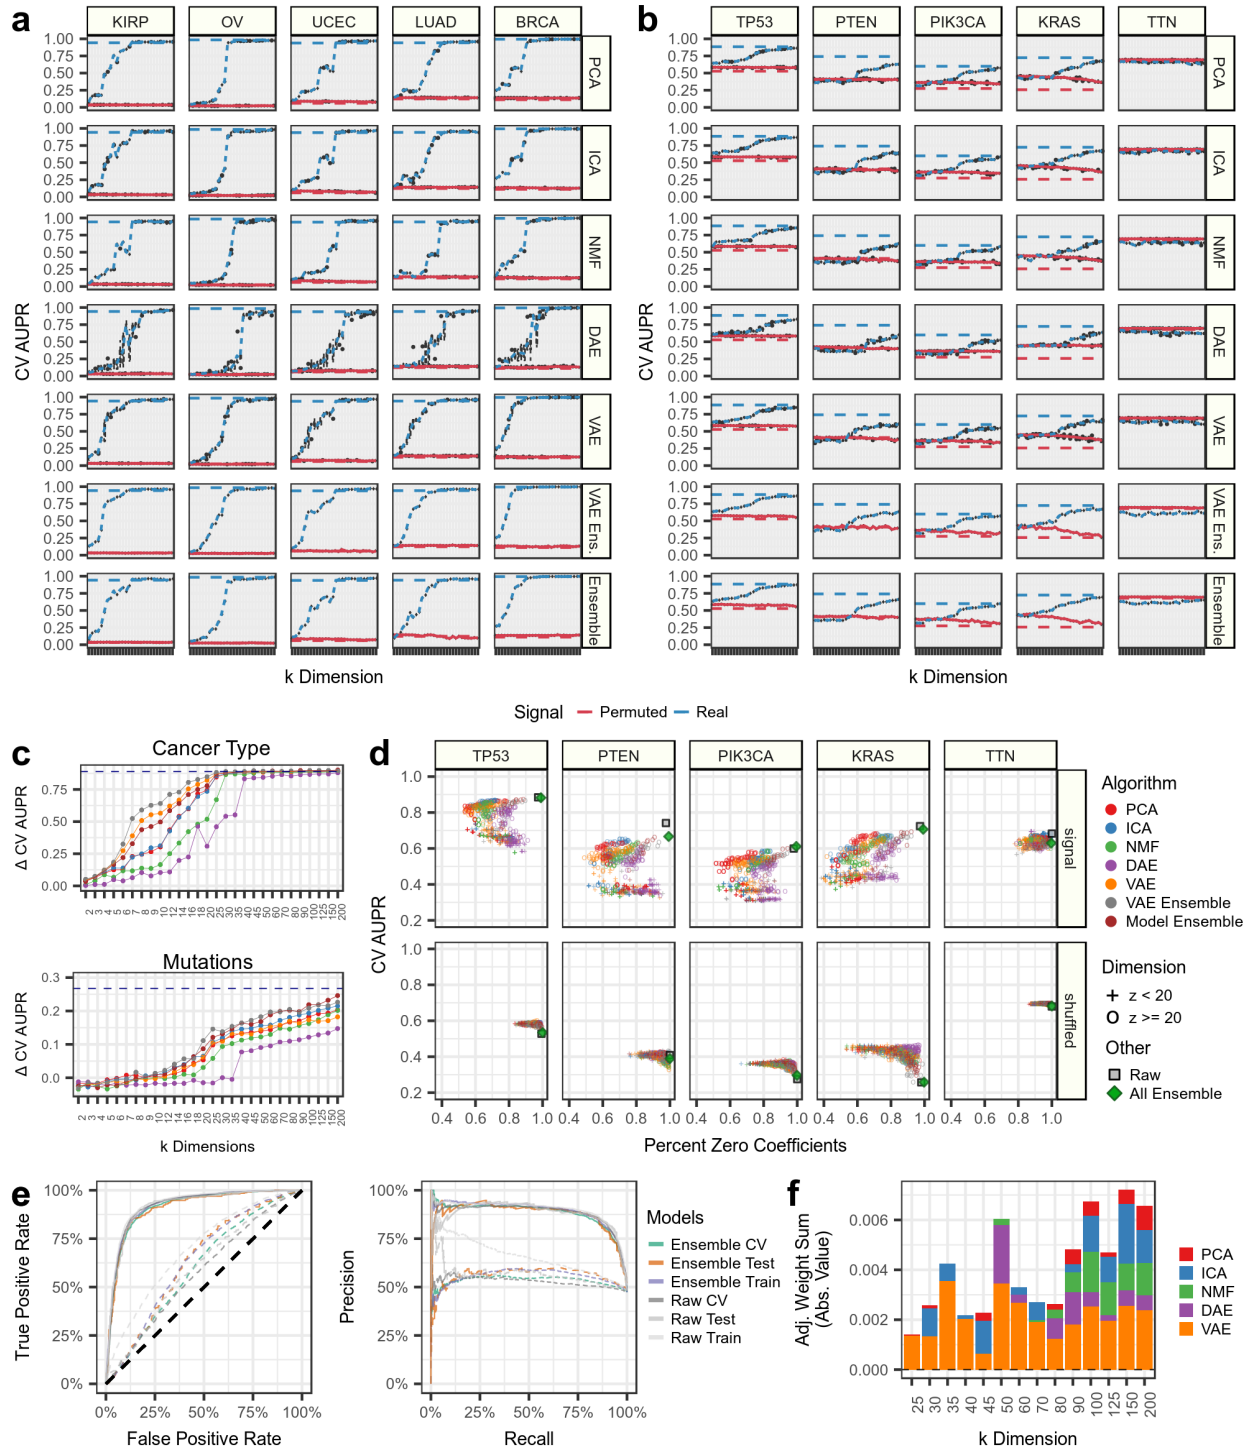

378

379 **Figure 7: Using BioBombe sequential compression in The Cancer Genome Atlas (TCGA) as features**  
 380 **in supervised machine learning tasks. Predicting (a) cancer-type status and (b) gene mutation**  
 381 **status for select cancer-types and important cancer genes using five compression algorithms and**  
 382 **two ensemble models. The area under the precision recall (AUPR) curve for cross validation (CV)**  
 383 **data partitions is shown. The blue lines represent predictions made with permuted data input**

384 into each compression algorithm. The dotted lines represent AUPR on untransformed RNAseq  
385 data. The dotted gray line represents a hypothetical random guess. **(c)** Tracking the average  
386 change in AUPR between real and permuted data across latent dimensions and compression  
387 models in predicting (*top*) cancer types and (*bottom*) mutation status. The average includes the  
388 five cancer types and mutations tracked in panels a and b. **(d)** Tracking the sparsity and  
389 performance of supervised models using BioBombe compressed features in real and permuted  
390 data. **(e)** Performance metrics for the all-compression feature ensemble model predicting *TP53*  
391 alterations. (*left*) Receiver operating characteristic (ROC) and (*right*) precision recall curves are  
392 shown. **(f)** The average absolute value weight per algorithm for the all-compression-feature  
393 ensemble model predicting *TP53* alterations. The adjusted scores are acquired by dividing by the  
394 number of latent dimensions in the given model.  
395

396           If optimizing a single model, a researcher can use one or many criteria to select an  
397 appropriate latent dimension. Measurements such as Akaike information criterion (AIC),  
398 Bayesian information criterion (BIC), stability, and cross validation (CV) can be applied to a  
399 series of latent dimensionalities [36,37]. Other algorithms, like Dirichlet processes, can naturally  
400 arrive at an appropriate dimension through several algorithm iterations [38]. Hidden layer  
401 dimensions of unsupervised neural networks are tunable hyperparameters defined by expected  
402 input data complexity and performance. However, applied to gene expression data these  
403 metrics often provide conflicting results and unclear suggestions. In genomics applications, the  
404 method Thresher uses a combination of outlier detection and PCA to identify the optimal  
405 number of clusters [39]. Compression model stability can also be used to determine an optimal  
406 latent dimensionality in gene expression data [40]. By considering only reproducible features,  
407 ICA revealed 139 modules from nearly 100,000 publicly available gene expression profiles [41].  
408 However, rather than using heuristics to select a biologically-appropriate latent dimension, a  
409 researcher may instead elect to compress gene expression data into many different latent  
410 space dimensionalities to generate many different feature representations.

411           There are many limitations to our approach and analysis. First, our approach takes a  
412 long time to run. We are training many different algorithms across many different latent  
413 dimensions and iterations, which requires a lot of compute time. However, because we are  
414 training many models independently, this task can be parallelized. Additionally, we did not  
415 evaluate dimensions above  $k = 200$ . It is likely that many more signatures can be learned, and  
416 possibly with even higher association strengths in higher dimensions for certain biology. We  
417 also do not have a mechanism to detect compressed features that represent technical artifacts.  
418 Moreover, we did not explore adding hidden layers in AE models. Many models trained on gene  
419 expression data have benefited from using multiple hidden layers in neural network  
420 architectures [7,42]. Additional methods, like DeepLift, can be used to reveal gene importance  
421 values in internal representations of deep networks [43,44].

422           An additional challenge is interpreting the biological content of the compressed gene  
423 expression features. Overrepresentation analysis (ORA) and gene set enrichment analysis  
424 (GSEA) are commonly applied but have significant limitations [24,45]. ORA requires a user to  
425 select a cutoff, typically based on standard deviation, to build representative gene sets from  
426 each feature. ORA tests also do not consider the weights, or gene importance scores, in each  
427 compression feature. Conversely, GSEA operates on ranked features, but often requires many  
428 permutations to establish significance. Furthermore, ORA requires each tail of the compressed  
429 feature distribution to be interpreted separately in algorithms that also learn negative weights.  
430 The weight distribution is dependent on the specific compression algorithm, and the same  
431 cutoff may not be appropriate for all algorithms and all compressed features. Instead, we  
432 implemented a network projection based approach to interpret compressed latent gene

433 expression features [46,47]. The approach is applied to the full and continuous distribution of  
434 gene weights, operates independently of the algorithm feature distribution, does not require  
435 arbitrary thresholds, and obviates the need to consider both tails of the distribution separately.  
436 Nevertheless, additional downstream experimental validation is required to determine if the  
437 constructed feature actually represents the biology it has been assigned.

438

439 **Conclusions:**

440 To enhance biological signature discovery, it is best to compress gene expression data  
441 using several algorithms and many different latent space dimensionalities. These signatures  
442 represent important biological signals including various cell types, phenotypes, biomarkers, and  
443 other sample characteristics. We showed, through several experiments tracking gene  
444 expression signatures, gene set coverage, and supervised learning performance, that optimal  
445 biological features are learned using a variety of latent space dimensionalities and different  
446 compression algorithms. As unsupervised machine learning continues to be applied to derive  
447 insight from biomedical datasets, researchers should shift focus away from optimizing a single  
448 model based on certain mathematical heuristics, and instead towards learning good and  
449 reproducible biological representations that generalize to alternative datasets regardless of  
450 compression algorithm and latent dimensionality.

451

452

453

454



455 **Methods:**

456 *Transcriptomic compendia acquisition and processing*

457 We downloaded transcriptomic datasets from publicly available resources. We  
458 downloaded the batch-corrected TCGA PanCanAtlas RNAseq data from the National Cancer  
459 Institute Genomic Data Commons ([https://gdc.cancer.gov/about-](https://gdc.cancer.gov/about-data/publications/pancanatlas)  
460 [data/publications/pancanatlas](https://gdc.cancer.gov/about-data/publications/pancanatlas)). These data consisted of 11,069 samples with 20,531 measured  
461 genes quantified with RSEM and normalized with log transformation. We converted Hugo  
462 Symbol gene identifiers into Entrez gene identifiers and discarded non-protein coding genes  
463 and genes that failed to map. We also removed tumors that were measured from multiple sites.  
464 This resulted in a final TCGA PanCanAtlas gene expression matrix with 11,060 samples, which  
465 included 33 different cancer-types, and 16,148 genes. The breakdown of TCGA samples by  
466 cancer-type is provided in **Additional File 5**.

467 We downloaded the TPM normalized GTEx RNAseq data (version 7) from the GTEx data  
468 portal (<https://gtexportal.org/home/datasets>). There were 11,688 samples and 56,202 genes in  
469 this dataset. After selecting only protein-coding genes and converting Hugo Symbols to Entrez  
470 gene identifiers, we considered 18,356 genes. There are 53 different detailed tissue-types in  
471 this GTEx version. The tissues types included in these data are provided in **Additional File 5**.

472 Lastly, we retrieved the TARGET RNAseq gene expression data from the UCSC Xena data  
473 portal [48]. The TARGET data was processed through the FPKM UCSC Toil RNA-seq pipeline and  
474 was normalized with RSEM and log transformed [49]. The original matrix consists of 734  
475 samples and 60,498 Ensembl gene identifiers. We converted the Ensembl gene identifiers to  
476 Entrez gene names and retained only protein-coding genes. This procedure resulted in a total of

477 18,753 genes measured in TARGET. There are 7 cancer-types profiled in TARGET and the  
478 specific breakdown is available in **Additional File 5**. All specific downloading and processing  
479 steps can be viewed and reproduced at  
480 <https://github.com/greenelab/BioBombe/tree/master/0.expression-download>.

481

#### 482 *Training unsupervised neural networks*

483 Autoencoders (AE) are unsupervised neural networks that learn through minimizing the  
484 reconstruction of input data after passing the data through one or several intermediate layers  
485 [50]. Typically, these layers are of a lower dimension than the input, so the algorithms must  
486 compress the input data. Denoising autoencoders (DAE) add noise to input layers during  
487 training to regularize solutions and improve generalizability [51]. Variational autoencoders  
488 (VAE) add regularization through an additional penalty term imposed on the objective function  
489 [52,53]. In a VAE, the latent space dimensions ( $k$ ) are penalized with a Kullback-Leibler (KL)  
490 divergence penalty restricting the distribution of samples in the latent space to Gaussian  
491 distributions. We independently optimized each AE model across a grid of hyperparameter  
492 combinations including 6 representative latent dimensionalities (described in **Additional File 1**  
493 and **Additional File 2: Figure S2**).

494

#### 495 *Training compression algorithms with sequential latent dimensions*

496 Independently for each dataset (TCGA, GTEx, and TARGET), we performed the following  
497 procedure to train the compression algorithms. First, we randomly split data into 90% training  
498 and 10% testing partitions. We balanced each partition by cancer type or tissue type, which

499 meant that each split contained relatively equal representation of tissues. Before input into the  
500 compression algorithm, we transformed the gene expression values by gene to a range  
501 between 0 and 1 independently for the testing and training partitions. We used the training set  
502 to train each compression algorithm. We used the scikit-learn implementations of PCA, ICA, and  
503 NMF, and the Tybalt implementations of VAE and DAE [8,54].

504       After learning optimized compression models with the training data, we transformed  
505 the testing data using these models. We assessed performance metrics using both training and  
506 testing data to reduce bias. In addition to training with real data, we also trained all models  
507 with randomly permuted data. To permute the training data, we randomly shuffled the gene  
508 expression values for all genes independently. We also transformed testing partition data with  
509 models trained using randomly permuted data. Training with permuted data removes the  
510 correlational structure in the data and can help set performance metric baselines.

511       One of our goals was to assess differences in performance and biological signal  
512 detection across a range of latent dimensionalities ( $k$ ). To this end, we trained all algorithms  
513 with various  $k$  dimensionalities including  $k = 2, 3, 4, 5, 6, 7, 8, 9, 10, 12, 14, 16, 18, 20, 25, 30,$   
514  $35, 40, 45, 50, 60, 70, 80, 90, 100, 125, 150,$  and 200 for a total of 28 different dimensions. All of  
515 these models were trained independently. Lastly, for each  $k$  dimension we trained five different  
516 models initialized with five different random seeds. In total, considering the three datasets, five  
517 algorithms, randomly permuted training data, all 28  $k$  dimensions, and five initializations, we  
518 trained 4,200 different compression models (**Additional File 2: Figure S1**). Therefore, in total,  
519 we generated 185,100 different compression features.

520

## 521 *Evaluating compression algorithm performance*

522           We evaluated all compression algorithms on three main tasks: Reconstruction, sample  
523 correlation, and weight matrix stability. First, we evaluated how well the input data is  
524 reconstructed after passing through the bottleneck layer. Because the input data was  
525 transformed to a distribution between 0 and 1, we used binary cross entropy to measure the  
526 difference between algorithm input and output as a measure of reconstruction cost. The lower  
527 the reconstruction cost, the higher fidelity reconstruction, and therefore the higher proportion  
528 of signals captured in the latent space features. We also assessed the Pearson correlation of all  
529 samples comparing input to reconstructed output. This value is similar to reconstruction and  
530 can be quickly tracked at an individual sample level. Lastly, we used singular vector canonical  
531 correlation analysis (SVCCA) to determine model stability within and model similarity between  
532 algorithms and across latent dimensions [19]. The SVCCA method consisted of two distinct  
533 steps. First, singular value decomposition (SVD) was performed on two input weight matrices.  
534 The singular values that combined to reconstruct 98% of the signal in the data were retained.  
535 Next, the SVD transformed weight matrix was input into a canonical correlation analysis (CCA).  
536 CCA aligned different features in the weight matrix based on maximal correlation after learning  
537 a series of linear transformations. Taken together, SVCCA outputs a single metric comparing  
538 two input weight matrices that represents stability across model initializations and average  
539 similarity of two different models. Because we used the weight matrices, the similarity  
540 describes signature discovery. We use the distribution of SVCCA similarity measures across all  
541 pairwise algorithm initializations and latent dimensionalities to indicate model stability [19].

542

543 *Using BioBombe as a signature discovery tool*

544 We tested the ability of BioBombe sequentially compressed features to distinguish  
545 sample sex in GTEx and TCGA data, and MYCN amplification in TARGET NBL data. We  
546 performed a two-tailed independent t-test assuming equal variance comparing male and  
547 female samples, and NBL samples with and without MYCN amplification. We applied the t-test  
548 to all compression features identified across algorithms, initializations, and dimensions. Shown  
549 in the figures are the top scoring feature per latent space dimension and algorithm.

550 We applied the optimal MYCN signature learned in TARGET to an alternative dataset  
551 consisting of a series of publicly available NBL cell lines [23]. The data were processed using  
552 STAR, and we accessed the processed FPKM matrix from figshare [55]. We transformed the  
553 dataset with the identified signatures using the following operation:

554 
$$S_{g'}^T * D_{g' \times n} = D'_{s \times n}$$

555 Where  $D$  represents the respective RNAseq data to transform,  $S$  represents the specific  
556 signature,  $g'$  represents the overlapping genes measured in both datasets,  $n$  represents  
557 samples, and  $D'_s$  represents the signature scores in the transformed dataset. Of the 8,000 genes  
558 measured in TARGET data, 7,653 were also measured in external NBL cell line dataset (95.6%).

559

560 *Gene network construction and processing*

561 We constructed networks using gene set collections compiled by version 6.2 of the  
562 Molecular Signatures Database (MSigDB) and cell types derived from xCell [24–26]. These gene  
563 sets represent a series of genes that are involved in specific biological processes and functions.  
564 We integrated all openly licensed MSigDB collections which included hallmark gene sets (H),

565 positional gene sets (C1), curated gene sets (C2), motif gene sets (C3), computational gene sets  
566 (C4), Gene Ontology (GO) terms (C5), oncogenic gene sets (C6) and immunologic gene sets (C7).  
567 We omitted MSigDB gene sets that were not available under an open license (KEGG, BioCarta,  
568 and AAAS/STKE). The C2 gene set database was split into chemical and genetic perturbations  
569 (C2.CPG) and Reactome (C2.CP.Reactome). The C3 gene set was split into microRNA targets  
570 (C3.MIR) and transcription factor targets (C3.TFT). The C4 gene set was split into cancer gene  
571 neighborhoods (C4.CGN) and cancer modules (C4.CM). Lastly, the C5 gene set was split into GO  
572 Biological Processes (C5.BP), GO Cellular Components (C5.CC), and GO molecular functions  
573 (C5.MF). xCell represents a gene set compendia of 489 computationally derived gene signatures  
574 from 64 different human cell types. The number of gene sets in each curation is provided in  
575 **Additional File 6**. In BioBombe network projection, only a single collection is projected at a  
576 time.

577         To build the gene set network, we used hetio software [56]. Briefly, hetio builds  
578 networks that include multiple node types and edge relationships. We used hetio to build a  
579 single network containing all MSigDB collections and xCell gene sets listed above. The network  
580 consisted of 17,451 unique gene sets and 2,159,021 edges representing gene set membership  
581 among 20,703 unique gene nodes (**Additional File 6**). In addition to generating a single network  
582 using curated gene sets, we also used hetio to generate 10 permuted networks. The networks  
583 are permuted using the XSwap algorithm, which randomizes connections while preserving node  
584 degree (i.e. the number of gene set relationships per gene) [57]. Therefore, the permuted  
585 networks are used to control for biases induced by uneven gene degree. We compared the

586 observed score against the distribution of permuted network scores to interpret the biological  
587 signatures in each compression feature.

588

### 589 *Rapid interpretation of compressed gene expression data*

590 Our goal was to quickly interpret the automatically generated compressed latent  
591 features learned by each unsupervised algorithm. To this end, we constructed gene set  
592 adjacency matrices with specific MSigDB or xCell gene set collections using hetio software. We  
593 then performed the following matrix multiplication against a given compressed weight matrix  
594 to obtain a raw score for all gene sets for each latent feature.

$$595 \quad H_{c \times n} * W_{n \times k} = G_{c \times k}$$

596 Where  $H$  represents the gene set adjacency matrix,  $c$  is the specific gene set collection, and  $n$   
597 represents genes.  $W$  represents the specific compression algorithm weight matrix, which  
598 includes  $n$  genes and  $k$  latent space features. The output of this matrix multiplication,  $G$ , is  
599 represented by  $c$  gene sets and  $k$  latent dimensions. Through a single matrix multiplication, the  
600 matrix  $G$  tracks raw BioBombe scores.

601 Because certain hub genes are more likely to be implicated in gene sets and longer gene  
602 sets will receive higher raw scores, we compared  $G$  to the distribution of permuted scores  
603 against all 10 permuted networks.

$$604 \quad H_p^{1-10}_{c \times n} * W_{n \times k} = G_p$$

$$605 \quad G_{z-score} = \frac{G_{c \times k} - \overline{G_p}}{\sigma(G_p)}$$

606 Where  $H_p^{1-10}$  represents the adjacency matrices for all 10 permuted networks and  $G_p$  represents  
607 the distribution of scores for the same  $k$  features for all permutations. We calculated the  $z$   
608 score for all gene sets by latent features ( $G_{z-score}$ ). This score represents the BioBombe Score.  
609 Other network-based gene set methods consider gene set influence based on network  
610 connectivity of gene set genes [46,47]. Instead, we used the latent feature weights derived  
611 from unsupervised compression algorithms as input, and the compiled gene set networks to  
612 assign biological function.

613 We also compared the BioBombe network projection approach to overrepresentation  
614 analyses (ORA). We did not compare the approach to gene set enrichment analysis (GSEA)  
615 because evaluating single latent features required many permutations and did not scale to the  
616 many thousands of compressed features we examined. We implemented ORA analysis using a  
617 Fisher's Exact test. The background genes used in the test included only the genes represented  
618 in the specific gene set collection.

619

#### 620 *Calculating gene set coverage of sequentially compressed gene expression data*

621 We were interested in determining the proportion of gene sets within gene set  
622 collections that were captured by the features derived from various compression algorithms.  
623 We considered a gene set "captured" by a compression feature if it had the highest positive or  
624 highest negative BioBombe  $z$  score compared to all other gene sets in that collection. We  
625 converted BioBombe  $z$  scores into  $p$  values using the `pnorm()` R function using a two-tailed test.  
626 We removed gene sets from consideration if their  $p$  values were not lower than a Bonferroni  
627 adjusted value determined by the total number of latent dimensionalities in the model. We



628 calculated coverage ( $C$ ) by considering all unique top gene sets ( $U$ ) identified by all features in  
629 the compression model ( $w$ ) and dividing by the total number of gene sets in the collection ( $T_c$ ).

630 
$$C = \frac{U_w}{T_c}$$

631 We calculated the coverage metric for all models independently ( $C_i$ ), for ensembles, or  
632 individual algorithms across all five iterations ( $C_e$ ), and for all models across  $k$  dimensions ( $C_k$ ).  
633 We also calculated the total coverage of all BioBombe features combined in a single model  
634 ( $C_{all}$ ). A larger coverage value indicated a model that captured a larger proportion of the  
635 signatures present in the given gene set collection.

636

637 *Downloading and processing publicly available expression data for neutrophil GTEX analysis*

638 We used an external dataset to validate the neutrophil feature that we identified to  
639 contribute to detecting blood signatures in GTEX. To assess the performance of this neutrophil  
640 signature, we downloaded data from the Gene Expression Omnibus (GEO) with accession  
641 number GSE103706 [27]. RNA was captured in this dataset using Illumina NextSeq 500. The  
642 dataset measured the gene expression of several replicates of two neutrophil-like cell lines, HL-  
643 60 and PLB-985, which were originally derived from acute myeloid leukemia (AML) patients.  
644 The PLB-985 cell line was previously identified as a subclone of HL-60, so we expect similar  
645 signature activity between the two lines [58]. Gene expression of the two cell lines was  
646 measured with and without neutrophil differentiation treatments. Though DMSO is frequently  
647 used to solubilize compounds and act as an experimental control, it has been used to create  
648 neutrophil-like cells [59], and the dataset we used was generated to compare this activity with  
649 untreated and DMSO with Nutridoma [27]. We tested the hypothesis that our neutrophil

650 signature would distinguish the samples with and without neutrophil differentiation treatment.

651 We transformed external datasets with the following operation:

652 
$$W_{k \times g'}^T * D_{g' \times n} = D'_{k \times n}$$

653 Where  $D$  represents the processed RNAseq data from GSE103706. Of 8,000 genes measured in

654  $W$ , 7,664 were also measured in  $D$  (95.8%). These 7,664 genes are represented by  $g'$ . All of the

655 “Neutrophils\_HPCA\_2” signature genes were measured in  $W$ .  $D'$  represents the GSE103706

656 data transformed along the specific compression feature. Each sample in  $D'$  is then considered

657 transformed by the specific signature captured in  $k$ . The specific genes representing

658 “Neutrophils\_HPCA\_2” is provided in **Additional File 3**.

659

660 *Downloading and processing publicly available expression data for monocyte GTEX analysis*

661 We used an additional external dataset to validate the identified monocyte signature.

662 We accessed processed data for the publicly available GEO dataset with accession number

663 GSE24759 [28]. The dataset was measured by Affymetrix HG-U133A (early access array) and

664 consisted of 211 samples representing 38 distinct and purified populations of cells, including

665 monocytes, undergoing various stages of hematopoiesis. The samples were purified from 4 to 7

666 independent donors each. Many xCell gene sets were computationally derived from this

667 dataset as well [25]. Not all genes in the weight matrices were measured in the GSE24759

668 dataset. For this application, 4,645 genes (58.06%) corresponded with the genes used in the

669 compression algorithms. Additionally, 168 out of 178 genes (94.38%) in the

670 “Monocyte\_FANTOM\_2” gene set were measured (**Additional File 3**). We investigated the

671 “Monocytes\_FANTOM\_2” signature because of its high enrichment in VAE  $k = 3$  and low  
672 enrichment in VAE  $k = 2$ .

673

674 *Machine learning classification of cancer types and gene alterations in TCGA*

675 We trained supervised machine learning models to predict cancer type from RNAseq  
676 features in TCGA PanCanAtlas RNAseq data. We implemented a logistic regression classifier  
677 with an elastic net penalty. The classifiers are controlled for mutation burden. More details  
678 about the specific implementation are described in Way et al. 2018 [60]. Here, we predicted all  
679 33 cancer types using all 11,060 samples. These predictions were independent per cancer type,  
680 which meant that we trained models with the same input gene expression data, but used 33  
681 different status matrices.

682 We also trained models to predict gene alteration status in the top 50 most mutated  
683 genes in the PanCanAtlas. These models are controlled for cancer type and mutation burden.  
684 We defined the status in this task using all non-silent mutations identified with a consensus  
685 mutation caller [61]. We also considered large copy number amplifications for oncogenes and  
686 deep copy number deletions for tumor suppressor genes as previously defined [62]. We used  
687 the threshold GISTIC2.0 calls for large copy amplifications (score = 2) and deep copy deletions  
688 (score = -2) in defining the status matrix [63]. For each gene alteration prediction, we removed  
689 samples with a hypermutator phenotype, defined by having log<sub>10</sub> mutation counts greater than  
690 five standard deviations above the mean. For the mutation prediction task, we also did not  
691 include certain cancer types in training. We omitted cancer types if they had less than 5% or  
692 more than 95% representation of samples with the given gene alteration. The positive and

693 negative sets must have also included at least 15 samples. We filtered out cancer types in this  
694 manner to avoid the classifiers from artificially detecting differences induced by unbalanced  
695 training sets.

696 We trained models with raw RNAseq data subset by the top 8,000 most variably  
697 expressed genes by median absolute deviation. The training data used was the same training  
698 set used for the sequential compression procedure. We also trained models using all  
699 compression matrices for each latent dimension, and using real and permuted data. We  
700 combined compressed features together to form three different types of ensemble models. The  
701 first type grouped all five iterations of VAE models per latent dimension to make predictions.  
702 The second type grouped features of five different algorithms (PCA, ICA, NMF, DAE, VAE) of a  
703 single iteration together to make predictions. The third ensemble aggregated all features  
704 learned by all algorithms, all initializations, and across all latent dimensions, which included a  
705 total of 30,850 features. In total, considering the 33 cancer types, 50 mutations, 28 latent  
706 dimensions, ensemble models, raw RNAseq features, real and permuted data, and 5  
707 initializations per compression, we trained and evaluated 32,868 different supervised models.

708 We optimized all of the models independently using 5-fold cross validation (CV). We  
709 searched over a grid of elastic net mixing and alpha hyperparameters. The elastic net mixing  
710 parameter represents the tradeoff between l1 and l2 penalties (where mixing = 0 represents an  
711 l2 penalty) and controls the sparsity of solutions [64]. Alpha is a penalty tuning the impact of  
712 regularization, with higher values inducing higher penalties on gene coefficients. We searched  
713 over a grid for both hyperparameters (alpha = 0.1, 0.13, 0.15, 0.2, 0.25, 0.3 and mixing = 0.15,  
714 0.16, 0.2, 0.25, 0.3, 0.4) and selected the combination with the highest CV AUROC. For each

715 model, we tested performance using the original held out testing set that was also used to  
716 assess compression model performance.

717

### 718 *Reproducible software*

719 All code to perform all analyses and generate all results and figures is provided with an  
720 open source license at <https://github.com/greenelab/biobombe> [65].

721

### 722 **List of abbreviations:**

723 RNAseq = RNA sequencing; PCA = principal components analysis; ICA = independent  
724 components analysis; NMF = non-negative matrix factorization; AE = autoencoder; DAE =  
725 denoising autoencoder; VAE = variational autoencoder; TCGA = the cancer genome atlas; GTEx  
726 = genome tissue expression project; TARGET = therapeutically applicable research to generate  
727 effective treatments project; BRCA = breast invasive carcinoma; COAD = colon  
728 adenocarcinoma; LGG = low grade glioma; PCPG = pheochromocytoma and paraganglioma;  
729 LAML = acute myeloid leukemia; LUAD = lung adenocarcinoma; GEO = gene expression  
730 omnibus; ROC = receiver operating characteristic; PR = precision recall; AUROC = area under the  
731 receiver operating characteristic curve; AUPR = area under the precision recall curve; CV = cross  
732 validation; ORA = overrepresentation analysis; GSEA = gene set enrichment analysis; SVD =  
733 singular value decomposition; CCA = canonical correlation analysis; SVCCA = singular vector  
734 canonical correlation analysis; TF = transcription factor; DMSO = dimethyl sulfoxide

735

### 736 **Declarations:**

737 *Ethics approval and consent to participate*

738 The TCGA, GTEx, and TARGET data used are publicly available and their use was  
739 previously approved by their respective ethics committees.

740 *Consent for publication*

741 Not applicable.

742 *Availability of data and material*

743 All data used and results generated in this manuscript are publicly available. The  
744 analyzed data can be accessed in the following locations: TCGA data can be accessed at  
745 <https://gdc.cancer.gov/about-data/publications/pancanatlas>, the GTEx data can be  
746 accessed at <https://gtexportal.org/home/datasets>, the TARGET data can be accessed at  
747 [https://toil.xenahubs.net/download/target\\_RSEM\\_gene\\_fpkms.gz](https://toil.xenahubs.net/download/target_RSEM_gene_fpkms.gz), the neutrophil  
748 validation data can be accessed using gene expression omnibus (GEO) accession number  
749 GSE103706 (<https://www.ncbi.nlm.nih.gov/geo/query/acc.cgi?acc=GSE103706>), the  
750 monocyte validation data can be accessed using GEO accession number GSE24759  
751 (<https://www.ncbi.nlm.nih.gov/geo/query/acc.cgi?acc=GSE24759>). Software to  
752 reproduce the analyses, and all results generated in this manuscript can be accessed at  
753 <https://github.com/greenelab/biobombe>. These results have also been archived in an  
754 additional publicly available repository at <https://zenodo.org/record/2587854>.

755 *Competing interests*

756 The authors declare that they have no competing interests.

757 *Funding*

758 This work was funded in party by The Gordon and Betty Moore Foundation under GBMF  
759 4552 (CSG) and the National Institutes of Health's National Human Genome Research  
760 Institute under R01 HG010067 (CSG) and the National Institutes of Health under T32  
761 HG000046 (GPW).

#### 762 *Authors' contributions*

763 GPW performed the analysis, wrote the BioBombe software, generated the figures, and  
764 wrote the manuscript. GPW and CSG designed the study and interpreted the results. MZ  
765 and DSH developed the network software. All authors read, revised, and approved the  
766 final manuscript.

#### 767 *Acknowledgements*

768 We would like to thank Jaclyn Taroni, Yoson Park, and Alexandra Lee for insightful  
769 discussions and code review. We also thank Jo Lynne Rokita for insightful discussions  
770 regarding the neuroblastoma analysis.

771

#### 772 **References:**

773 1. Fehrmann RSN, Karjalainen JM, Krajewska M, Westra H-J, Maloney D, Simeonov A, et al.  
774 Gene expression analysis identifies global gene dosage sensitivity in cancer. *Nat Genet.*  
775 2015;47:115–25.

776 2. Engreitz JM, Daigle BJ, Marshall JJ, Altman RB. Independent component analysis: Mining  
777 microarray data for fundamental human gene expression modules. *J Biomed Inform.*  
778 2010;43:932–44.

779 3. Kong W, Vanderburg CR, Gunshin H, Rogers JT, Huang X. A review of independent component  
780 analysis application to microarray gene expression data. *BioTechniques.* 2008;45:501–20.

781 4. Gaujoux R, Seoighe C. CellMix: a comprehensive toolbox for gene expression deconvolution.  
782 *Bioinforma Oxf Engl.* 2013;29:2211–2.

- 783 5. Shen-Orr SS, Gaujoux R. Computational deconvolution: extracting cell type-specific  
784 information from heterogeneous samples. *Curr Opin Immunol*. 2013;25:571–8.
- 785 6. Tan J, Doing G, Lewis KA, Price CE, Chen KM, Cady KC, et al. Unsupervised Extraction of Stable  
786 Expression Signatures from Public Compendia with an Ensemble of Neural Networks. *Cell Syst*.  
787 2017;5:63–71.e6.
- 788 7. Chen L, Cai C, Chen V, Lu X. Learning a hierarchical representation of the yeast transcriptomic  
789 machinery using an autoencoder model. *BMC Bioinformatics*. 2016;17:S9.
- 790 8. Way GP, Greene CS. Extracting a biologically relevant latent space from cancer  
791 transcriptomes with variational autoencoders. *Pac Symp Biocomput Pac Symp Biocomput*.  
792 2018;23:80–91.
- 793 9. Rampasek L, Hidru D, Smirnov P, Haibe-Kains B, Goldenberg A. Dr.VAE: Drug Response  
794 Variational Autoencoder. *ArXiv170608203 Stat [Internet]*. 2017; Available from:  
795 <http://arxiv.org/abs/1706.08203>
- 796 10. Weinstein JN, Collisson EA, Mills GB, Shaw KM, Ozenberger BA, Ellrott K, et al. The Cancer  
797 Genome Atlas Pan-Cancer Analysis Project. *Nat Genet*. 2013;45:1113–20.
- 798 11. GTEx Consortium. The Genotype-Tissue Expression (GTEx) project. *Nat Genet*. 2013;45:580–  
799 5.
- 800 12. Mullighan CG, Su X, Zhang J, Radtke I, Phillips LAA, Miller CB, et al. Deletion of IKZF1 and  
801 prognosis in acute lymphoblastic leukemia. *N Engl J Med*. 2009;360:470–80.
- 802 13. Way G. TCGA BioBombe Results [Internet]. Zenodo; 2018 [cited 2019 Jan 20]. Available  
803 from: <https://zenodo.org/record/2110752>
- 804 14. Way G. GTEx BioBombe Results [Internet]. Zenodo; 2018 [cited 2019 Jan 20]. Available  
805 from: <https://zenodo.org/record/2300616>
- 806 15. Way G. TARGET BioBombe Results [Internet]. Zenodo; 2018 [cited 2019 Jan 20]. Available  
807 from: <https://zenodo.org/record/2222463>
- 808 16. Way G. TCGA BioBombe Results - Randomly Permuted Data [Internet]. Zenodo; 2018 [cited  
809 2019 Jan 20]. Available from: <https://zenodo.org/record/2221216>
- 810 17. Way G. GTEx BioBombe Results - Randomly Permuted Data [Internet]. Zenodo; 2018 [cited  
811 2019 Jan 20]. Available from: <https://zenodo.org/record/2386816>
- 812 18. Way G. TARGET BioBombe Results - Randomly Permuted Data [Internet]. Zenodo; 2018  
813 [cited 2019 Jan 20]. Available from: <https://zenodo.org/record/2222469>



- 814 19. Raghu M, Gilmer J, Yosinski J, Sohl-Dickstein J. SVCCA: Singular Vector Canonical Correlation  
815 Analysis for Deep Learning Dynamics and Interpretability. *Neural Inf Process Syst NeurIPS*. 2017;
- 816 20. Clark B, Stein-O'Brien G, Shiao F, Cannon G, Davis E, Sherman T, et al. Comprehensive  
817 analysis of retinal development at single cell resolution identifies NFI factors as essential for  
818 mitotic exit and specification of late-born cells. *bioRxiv [Internet]*. 2018 [cited 2019 Feb  
819 17];<https://doi.org/10.1101/378950>. Available from:  
820 <http://biorxiv.org/lookup/doi/10.1101/378950>
- 821 21. Stein-O'Brien GL, Clark BS, Sherman T, Zibetti C, Hu Q, Sealton R, et al. Decomposing cell  
822 identity for transfer learning across cellular measurements, platforms, tissues, and species.  
823 *bioRxiv [Internet]*. 2018 [cited 2019 Jan 28];<https://doi.org/10.1101/395004>. Available from:  
824 <http://biorxiv.org/lookup/doi/10.1101/395004>
- 825 22. Huang M, Weiss WA. Neuroblastoma and MYCN. *Cold Spring Harb Perspect Med*.  
826 2013;3:a014415–a014415.
- 827 23. Harenza JL, Diamond MA, Adams RN, Song MM, Davidson HL, Hart LS, et al. Transcriptomic  
828 profiling of 39 commonly-used neuroblastoma cell lines. *Sci Data*. 2017;4:170033.
- 829 24. Subramanian A, Tamayo P, Mootha VK, Mukherjee S, Ebert BL, Gillette MA, et al. Gene set  
830 enrichment analysis: A knowledge-based approach for interpreting genome-wide expression  
831 profiles. *Proc Natl Acad Sci*. 2005;102:15545–50.
- 832 25. Aran D, Hu Z, Butte AJ. xCell: digitally portraying the tissue cellular heterogeneity landscape.  
833 *Genome Biol [Internet]*. 2017 [cited 2019 Jan 15];18. Available from:  
834 <https://genomebiology.biomedcentral.com/articles/10.1186/s13059-017-1349-1>
- 835 26. Liberzon A, Birger C, Thorvaldsdóttir H, Ghandi M, Mesirov JP, Tamayo P. The Molecular  
836 Signatures Database Hallmark Gene Set Collection. *Cell Syst*. 2015;1:417–25.
- 837 27. Rincón E, Rocha-Gregg BL, Collins SR. A map of gene expression in neutrophil-like cell lines.  
838 *BMC Genomics*. 2018;19:573.
- 839 28. Novershtern N, Subramanian A, Lawton LN, Mak RH, Haining WN, McConkey ME, et al.  
840 Densely interconnected transcriptional circuits control cell states in human hematopoiesis. *Cell*.  
841 2011;144:296–309.
- 842 29. Greenman C, Stephens P, Smith R, Dalgliesh GL, Hunter C, Bignell G, et al. Patterns of  
843 somatic mutation in human cancer genomes. *Nature*. 2007;446:153–8.
- 844 30. Shi J, Luo Z. Nonlinear dimensionality reduction of gene expression data for visualization  
845 and clustering analysis of cancer tissue samples. *Comput Biol Med*. 2010;40:723–32.
- 846 31. Bartenhagen C, Klein H-U, Ruckert C, Jiang X, Dugas M. Comparative study of unsupervised  
847 dimension reduction techniques for the visualization of microarray gene expression data. *BMC*

- 848 Bioinformatics [Internet]. 2010 [cited 2019 Jan 26];11. Available from:  
849 <https://bmcbioinformatics.biomedcentral.com/articles/10.1186/1471-2105-11-567>
- 850 32. Becht E, McInnes L, Healy J, Dutertre C-A, Kwok IWH, Ng LG, et al. Dimensionality reduction  
851 for visualizing single-cell data using UMAP. *Nat Biotechnol*. 2018;37:38–44.
- 852 33. Kobak D, Berens P. The art of using t-SNE for single-cell transcriptomics. *bioRxiv* [Internet].  
853 2018 [cited 2019 Jan 26];<http://biorxiv.org/lookup/doi/10.1101/453449>. Available from:  
854 <http://biorxiv.org/lookup/doi/10.1101/453449>
- 855 34. Maaten L van der, Hinton G. Visualizing Data using t-SNE. *J Mach Learn Res*. 2008;9:2579–  
856 605.
- 857 35. McInnes L, Healy J, Melville J. UMAP: Uniform Manifold Approximation and Projection for  
858 Dimension Reduction. *arXiv:180203426* [Internet]. 2018; Available from:  
859 <https://arxiv.org/abs/1802.03426>
- 860 36. Ben-Hur A, Elisseeff A, Guyon I. A stability based method for discovering structure in  
861 clustered data. *Pac Symp Biocomput Pac Symp Biocomput*. 2002;6–17.
- 862 37. Wang J. Consistent selection of the number of clusters via crossvalidation. *Biometrika*.  
863 2010;97:893–904.
- 864 38. Wang L, Wang X. Hierarchical Dirichlet process model for gene expression clustering.  
865 *EURASIP J Bioinforma Syst Biol*. 2013;2013:5.
- 866 39. Wang M, Abrams ZB, Kornblau SM, Coombes KR. Thresher: determining the number of  
867 clusters while removing outliers. *BMC Bioinformatics*. 2018;19:9.
- 868 40. Wu S, Joseph A, Hammonds AS, Celniker SE, Yu B, Frise E. Stability-driven nonnegative  
869 matrix factorization to interpret spatial gene expression and build local gene networks. *Proc*  
870 *Natl Acad Sci*. 2016;113:4290–5.
- 871 41. Zhou W, Altman RB. Data-driven human transcriptomic modules determined by  
872 independent component analysis. *BMC Bioinformatics* [Internet]. 2018 [cited 2018 Dec 22];19.  
873 Available from: [https://bmcbioinformatics.biomedcentral.com/articles/10.1186/s12859-018-](https://bmcbioinformatics.biomedcentral.com/articles/10.1186/s12859-018-2338-4)  
874 [2338-4](https://bmcbioinformatics.biomedcentral.com/articles/10.1186/s12859-018-2338-4)
- 875 42. Lopez R, Regier J, Cole MB, Jordan MI, Yosef N. Deep generative modeling for single-cell  
876 transcriptomics. *Nat Methods*. 2018;15:1053–8.
- 877 43. Shrikumar A, Greenside P, Kundaje A. Learning Important Features Through Propagating  
878 Activation Differences. *ArXiv170402685 Cs* [Internet]. 2017; Available from:  
879 <http://arxiv.org/abs/1704.02685>

- 880 44. Lin C, Jain S, Kim H, Bar-Joseph Z. Using neural networks for reducing the dimensions of  
881 single-cell RNA-Seq data. *Nucleic Acids Res.* 2017;45:e156–e156.
- 882 45. Wang J, Vasaiakar S, Shi Z, Greer M, Zhang B. WebGestalt 2017: a more comprehensive,  
883 powerful, flexible and interactive gene set enrichment analysis toolkit. *Nucleic Acids Res.*  
884 2017;45:W130–7.
- 885 46. Fang Z, Tian W, Ji H. A network-based gene-weighting approach for pathway analysis. *Cell*  
886 *Res.* 2012;22:565–80.
- 887 47. Dong X, Hao Y, Wang X, Tian W. LEGO: a novel method for gene set over-representation  
888 analysis by incorporating network-based gene weights. *Sci Rep [Internet].* 2016 [cited 2019 Jan  
889 14];6. Available from: <http://www.nature.com/articles/srep18871>
- 890 48. Goldman M, Craft B, Kamath A, Brooks AN, Zhu J, Haussler D. The UCSC Xena Platform for  
891 cancer genomics data visualization and interpretation. *bioRxiv [Internet].* 2018 [cited 2019 Jan  
892 21]; Available from: <http://biorxiv.org/lookup/doi/10.1101/326470>
- 893 49. Vivian J, Rao AA, Nothaft FA, Ketchum C, Armstrong J, Novak A, et al. Toil enables  
894 reproducible, open source, big biomedical data analyses. *Nat Biotechnol.* 2017;35:314–6.
- 895 50. Baldi P, Hornik K. Neural networks and principal component analysis: Learning from  
896 examples without local minima. *Neural Netw.* 1989;2:53–8.
- 897 51. Vincent P, Larochelle H, Bengio Y, Manzagol P-A. Extracting and Composing Robust Features  
898 with Denoising Autoencoders. *Proc 25th Int Conf Mach Learn [Internet].* New York, NY, USA:  
899 ACM; 2008. p. 1096–1103. Available from: <http://doi.acm.org/10.1145/1390156.1390294>
- 900 52. Kingma DP, Welling M. Auto-Encoding Variational Bayes. *ArXiv13126114 Cs Stat [Internet].*  
901 2013 [cited 2017 Mar 6]; Available from: <http://arxiv.org/abs/1312.6114>
- 902 53. Rezende DJ, Mohamed S, Wierstra D. Stochastic Backpropagation and Approximate  
903 Inference in Deep Generative Models. *ArXiv14014082 Cs Stat [Internet].* 2014 [cited 2017 May  
904 10]; Available from: <http://arxiv.org/abs/1401.4082>
- 905 54. Pedregosa F, Varoquaux G, Gramfort A, Michel V, Thirion B, Grisel O, et al. Scikit-learn:  
906 Machine Learning in Python. *J Mach Learn Res.* 2011;12:2825–30.
- 907 55. Harenza JL. Transcriptomic profiling of 39 commonly-used neuroblastoma cell lines.  
908 2019; <https://figshare.com/articles/STAR-reads/7613975/3>.
- 909 56. Himmelstein DS, Lizee A, Hessler C, Brueggeman L, Chen SL, Hadley D, et al. Systematic  
910 integration of biomedical knowledge prioritizes drugs for repurposing. *eLife.* 2017;6.
- 911 57. Hanhijärvi S, Garriga GC, Puolamäki K. Randomization Techniques for Graphs. *Proc 2009*  
912 *SIAM Int Conf Data Min.* 2009;780–91.

- 913 58. Drexler HG, Dirks WG, Matsuo Y, MacLeod R a. F. False leukemia-lymphoma cell lines: an  
914 update on over 500 cell lines. *Leukemia*. 2003;17:416–26.
- 915 59. Jacob C, Leport M, Szilagyi C, Allen JM, Bertrand C, Lagente V. DMSO-treated HL60 cells: a  
916 model of neutrophil-like cells mainly expressing PDE4B subtype. *Int Immunopharmacol*.  
917 2002;2:1647–56.
- 918 60. Way GP, Sanchez-Vega F, La K, Armenia J, Chatila WK, Luna A, et al. Machine Learning  
919 Detects Pan-cancer Ras Pathway Activation in The Cancer Genome Atlas. *Cell Rep*.  
920 2018;23:172–180.e3.
- 921 61. Ellrott K, Bailey MH, Saksena G, Covington KR, Kandath C, Stewart C, et al. Scalable Open  
922 Science Approach for Mutation Calling of Tumor Exomes Using Multiple Genomic Pipelines. *Cell*  
923 *Syst*. 2018;6:271–281.e7.
- 924 62. Vogelstein B, Papadopoulos N, Velculescu VE, Zhou S, Diaz LA, Kinzler KW. Cancer Genome  
925 Landscapes. *Science*. 2013;339:1546–58.
- 926 63. Mermel CH, Schumacher SE, Hill B, Meyerson ML, Beroukheim R, Getz G. GISTIC2.0 facilitates  
927 sensitive and confident localization of the targets of focal somatic copy-number alteration in  
928 human cancers. *Genome Biol*. 2011;12:R41.
- 929 64. Zou H, Hastie T. Regularization and variable selection via the elastic net. *J R Stat Soc Ser B*  
930 *Stat Methodol*. 2005;67:301–20.
- 931 65. Way G. greenelab/BioBombe: BioBombe Analysis Version 1.1 [Internet]. Zenodo; 2019  
932 [cited 2019 Mar 9]. Available from: <https://zenodo.org/record/2587854>
- 933
